# Supplementary material
Source: PubMed Central journal article supplement (PMC4246266)
Supplement: pnas.201411461SI.pdf [file pnas.201411461SI.pdf]

# Supporting Information

Alvizo et al. 10.1073/pnas.1411461111

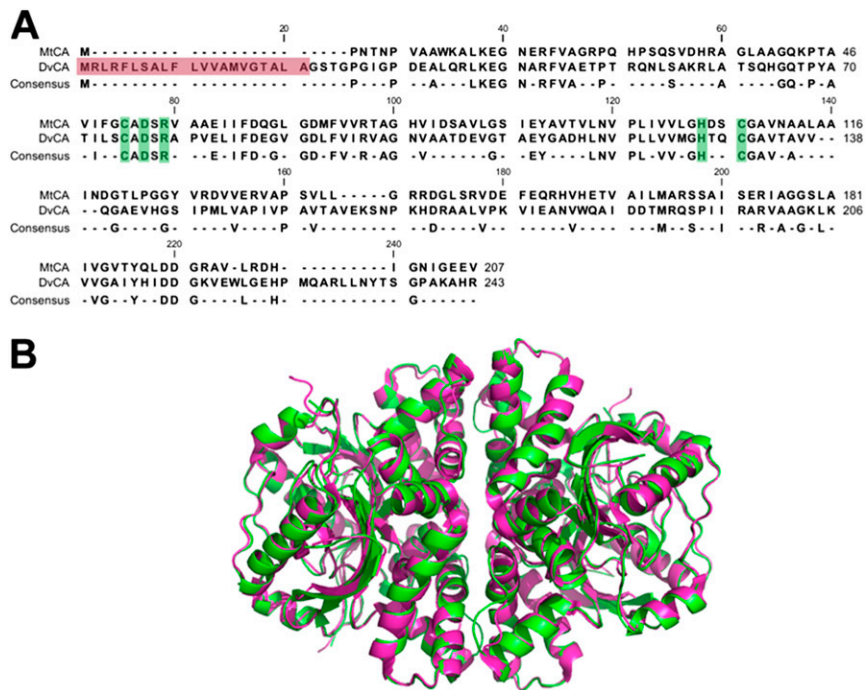

**Fig. S1.** (A) Sequence alignment between the  $\beta$ -carbonic anhydrase from *Mycobacterium tuberculosis* (MtCA) and *Desulfovibrio vulgaris*. The signal peptide from DvCA is highlighted in red and crucial catalytic and metal coordinating residues are highlighted in green. (B) The homology model of DvCA shown in green overlaid with the crystal structure of MtCA (Protein Data Bank ID code 2A5V) shown in pink. The rmsd between the template and the model was calculated to be 0.65 Å.

| A)         |          |          | B)         |          |          | C)         |          |          | D)         |          |          |
|------------|----------|----------|------------|----------|----------|------------|----------|----------|------------|----------|----------|
| Round 2 BB | Position | Mutation |
| T          | 4        | F        | R          | 16       | S        | T          | 4        | F        | S          | 35       | A        |
| T          | 30       | Q R      | R          | 31       | P        | Q          | 32       | R        | S          | 42       | A        |
| R          | 31       | P        | A          | 40       | W        | K          | 37       | R        | T          | 47       | R        |
| L          | 34       | H        | A          | 95       | V        | Q          | 43       | M        | E          | 68       | A        |
| A          | 40       | L        | A          | 121      | K L V W  | A          | 60       | C        | V          | 70       | I        |
| A          | 84       | Q        | V          | 131      | F        | D          | 96       | K E A    | A          | 95       | V        |
| Q          | 119      | M        | T          | 139      | K Q      | T          | 139      | M        | H          | 97       | F        |
| G          | 120      | R        | N          | 145      | F L W    | E          | 142      | L        | H          | 124      | G R      |
| T          | 139      | M        | K          | 147      | E T      | S          | 144      | L        | V          | 138      | L        |
| K          | 147      | E T      | E          | 159      | H V      | H          | 148      | T        | S          | 144      | L        |
|            |          |          | N          | 213      | E        | M          | 170      | F        | V          | 157      | A        |
|            |          |          | A          | 221      | C        | E          | 200      | R        | D          | 168      | E        |
|            |          |          |            |          |          | H          | 222      | C        | A          | 219      | T        |
|            |          |          |            |          |          | R          | 223      | C        | A          | 221      | C        |

**Fig. S2.** Round 2 libraries incorporated diversity from the first round of saturation mutagenesis. Library A is the elite library with a theoretical size of 2,304. B, C, and D are lower-tiered libraries with theoretical size of 69,120; 32,768; and 24,576, respectively. The accumulated size of the entire set was calculated at 128,768 total variants.







**Table S1. Cont.**

| WT AA | Position | Mutation | $\Delta$ Charge | FIOPC* | SD   |
|-------|----------|----------|-----------------|--------|------|
|       |          | G        | -1              | 1.47   | 0.01 |
|       |          | F        | -1              | 1.21   | 0.11 |
|       |          | E        | -2              | 3.31   | 0.07 |
| H     | 148      | T        |                 | 1.63   | 0.05 |
|       |          | A        |                 | 1.25   | 0.08 |
| V     | 157      | A        |                 | 1.15   | 0.07 |
| E     | 159      | V        | 1               | 1.27   | 0.06 |
|       |          | R        | 2               | 1.21   | 0.05 |
|       |          | H        | 1               | 1.67   | 0.05 |
| D     | 168      | E        |                 | 1.25   | 0.06 |
| M     | 170      | F        |                 | 1.83   | 0.05 |
| A     | 178      | G        |                 | 1.22   | 0.02 |
| E     | 200      | R        | 2               | 1.49   | 0.05 |
| M     | 207      | H        |                 | 1.13   | 0.07 |
|       |          | E        | -1              | 1.11   | 0.02 |
| N     | 213      | Q        |                 | 1.29   | 0.13 |
|       |          | E        | -1              | 1.74   | 0.02 |
| A     | 221      | C        |                 | 1.61   | 0.12 |
| H     | 222      | C        |                 | 1.94   | 0.15 |
| R     | 223      | Q        | -1              | 1.11   | 0.05 |
|       |          | C        | -1              | 1.49   | 0.02 |

\*Fold improvement over the positive control (wild-type enzyme).

**Table S2. High-throughput screening conditions**

| Evolution round | Parent   | Challenge |                 |      |                          | Assay    |     |                 |                        |                          |
|-----------------|----------|-----------|-----------------|------|--------------------------|----------|-----|-----------------|------------------------|--------------------------|
|                 |          | MDEA, M   | Temperature, °C | pH   | Duration of challenge, h | MDEA, mM | pH  | Temperature, °C | KHCO <sub>3</sub> , mM | Phenolphthalein, $\mu$ M |
| 1               | DvCA     | 3.0       | 42.0            | 10.0 | 24                       | 300      | 8.0 | 25              | 200                    | 400                      |
| 2               | DvCA 2.0 | 4.0       | 50.0            | 10.0 | 24                       | 300      | 8.0 | 45              | 200                    | 400                      |
| 3               | DvCA 3.0 | 4.2       | 65.0            | 10.5 | 24                       | 1,000    | 8.0 | 45              | 300                    | 400                      |
| 4               | DvCA 4.0 | 4.2       | 70.0            | 10.5 | 24                       | 500      | 8.0 | 45              | 400                    | 400                      |
| 5               | DvCA 5.0 | 4.2       | 82.5            | 10.5 | 24                       | 750      | 8.0 | 45              | 300                    | 1,100                    |
| 6               | DvCA 6.0 | 4.2       | 87.0            | 10.5 | 24                       | 500      | 8.8 | 25              | 300                    | 500                      |
| 7               | DvCA 7.0 | 4.2       | 101.0           | 10.5 | 1                        | 500      | 8.8 | 25              | 300                    | 500                      |
| 8               | DvCA 8.0 | 4.2       | 103.0           | 10.5 | 1                        | 500      | 8.8 | 25              | 300                    | 500                      |
| 9               | DvCA 9.0 | 4.2       | 107.0           | 10.5 | 1                        | 500      | 8.8 | 25              | 300                    | 500                      |
